# Supplementary material for: Enhancing the anisole hydrodeoxygenation activity over Ni/Nb2O5−xby tuning the oxophilicity of the support
Source: Royal Society of Chemistry journal article supplement (doi:10.1039/d2cy01745h), 2023-01-01
Supplement: d2cy01745h1.pdf [file d2cy01745h1.pdf]

## Supporting Information

### **Enhancing the anisole hydrodeoxygenation activity over Ni/Nb<sub>2</sub>O<sub>5-x</sub> by tuning the oxophilicity of the support**

Hadi Ali<sup>1,2,3</sup>, Tom Vandevyvere<sup>2,4</sup>, Jeroen Lauwaert<sup>4</sup>, Sushil Kumar Kansal<sup>5</sup>, Maarten K. Sabbe<sup>2,4</sup>, Shunmugavel Saravanamurugan<sup>1\*</sup>, Joris W. Thybaut<sup>2\*</sup>

<sup>1</sup>Laboratory of bioproduct Chemistry, Center of Innovative and Applied Bioprocessing, Sector 81 (knowledge City), Mohali-140306, Punjab, India, Email:saravana@ciab.res.in

<sup>2</sup>Laboratory for Chemical Technology (LCT), Ghent University, Technologiepark 125, 9052, Ghent, Belgium. Email:joris.thybaut@ugent.be

<sup>3</sup>Energy Research Centre, Panjab University, Chandigarh 160014, India

<sup>4</sup>Industrial Catalysis and Adsorption Technology (INCAT), Valentin Vaerwyckweg 1, 9000, Ghent, Belgium

<sup>5</sup>Department of Chemical Engineering and Technology, Panjab University, Chandigarh 160014, India

**Table S1.** Structural properties of different Ni/Nb<sub>2</sub>O<sub>5</sub>-based catalysts

| Catalyst                              | H <sub>2</sub> adsorption (μmol/g) <sup>a</sup> |            |            |       | H <sub>2</sub> -consumption (μmol/g) <sup>b</sup> |
|---------------------------------------|-------------------------------------------------|------------|------------|-------|---------------------------------------------------|
|                                       | <200 °C                                         | 200-300 °C | >300 °C    | Total |                                                   |
| Ni/Nb <sub>2</sub> O <sub>5</sub> -C  | 3.6 (13%)                                       | 3.4 (12%)  | 20.3 (75%) | 27.2  | 423                                               |
| Ni/Nb <sub>2</sub> O <sub>5</sub> -P  | 1.8 (7%)                                        | 1.0 (4%)   | 24.2 (89%) | 27.0  | 390                                               |
| Ni/Nb <sub>2</sub> O <sub>5</sub> -HT | 0.8 (3%)                                        | 4.2 (14%)  | 25.0 (83%) | 30.0  | 442                                               |
| Ni/Nb <sub>2</sub> O <sub>5</sub> -H  | 0.7 (3%)                                        | 5.5 (24%)  | 16.7 (73%) | 23.0  | 452                                               |

<sup>a</sup> Amount of H<sub>2</sub> adsorption derived from H<sub>2</sub>-TPD, <sup>b</sup> H<sub>2</sub> consumption derived from H<sub>2</sub>-TPR

**Table S2.** XPS results of the Nb 3d<sub>5/2</sub> and O 1s of Ni/Nb<sub>2</sub>O<sub>5</sub> catalysts

| Catalysts <sup>a</sup>                         | Nb 3d <sub>5/2</sub>               |                                                      | O 1s                                |
|------------------------------------------------|------------------------------------|------------------------------------------------------|-------------------------------------|
|                                                | Nb <sup>4+</sup> /Nb <sup>5+</sup> | Nb <sup>4+</sup> /Nb <sup>4++</sup> Nb <sup>5+</sup> | O <sub>β</sub> / O <sub>total</sub> |
| Ni/Nb <sub>2</sub> O <sub>5</sub> -C (Reduced) | 0.92                               | 0.4798                                               | 0.24                                |
| Ni/Nb <sub>2</sub> O <sub>5</sub> -H (Reduced) | 1.01                               | 0.504                                                | 0.35                                |

<sup>a</sup> Both the catalysts were reduced ex-situ with formier gas (5% H<sub>2</sub> in N<sub>2</sub>) at 400 °C for 1 h prior to the XPS analysis.

**Table S3.** Catalytic activity of Ni/Nb<sub>2</sub>O<sub>5</sub>-H and previous studies related to Ni-based catalysts for HDO of anisole

| Entry    | Catalysts                                                 | Reaction conditions                                      | Conv. (%) | Selec. DeO (%) | R <sub>HDO</sub> <sup>a</sup> (mmol. g <sup>-1</sup> <sub>Ni</sub> . h <sup>-1</sup> )*10 <sup>2</sup> | Reference        |
|----------|-----------------------------------------------------------|----------------------------------------------------------|-----------|----------------|--------------------------------------------------------------------------------------------------------|------------------|
| <b>1</b> | <b>3wt% Ni/Nb<sub>2</sub>O<sub>5</sub></b>                | <b>240 °C, 20bar H<sub>2</sub>, 1 h</b>                  | <b>90</b> | <b>91.0</b>    | <b>5.45</b>                                                                                            | <b>This work</b> |
| 2        | 10wt% Ni/SiO <sub>2</sub>                                 | 300 °C, 50 bar H <sub>2</sub> , 16 h                     | >99       | 80.4           | 0.23                                                                                                   | [1]              |
| 3        | 10wt% Ni/Al <sub>2</sub> O <sub>3</sub>                   | 300 °C, 50 bar H <sub>2</sub> , 16 h                     | >99       | 74             | 0.21                                                                                                   | [1]              |
| 5        | 30wt% Ni/Al <sub>2</sub> O <sub>3</sub> -ZrO <sub>2</sub> | 230 °C, 10 bar H <sub>2</sub> , 3 h                      | 100       | 77.6           | 0.97                                                                                                   | [2]              |
| 6        | 10wt% Ni/SiO <sub>2</sub>                                 | 220 °C, 30 bar H <sub>2</sub> , 4 h                      | >99       | 95             | 2.59                                                                                                   | [3]              |
| 7        | 90wt% Ni/Nb <sub>2</sub> O <sub>5</sub>                   | 240 °C, 30bar H <sub>2</sub> , 4h                        | >99       | 100            | 0.38                                                                                                   | [4]              |
| 8        | 60wt% Ni 5wt%Cu<br>30wt%Si                                | 320 °C, 60bar H <sub>2</sub> , 2.5h                      | ~85       | 100            | 2.59                                                                                                   | [5]              |
| 9        | 5wt% Ni/TiO <sub>2</sub> -ZrO <sub>2</sub>                | 300 °C, 40bar H <sub>2</sub> , 4h                        | 60        | ~87            | 5.19                                                                                                   | [6]              |
| 10       | 90wt%Ni /SiO <sub>2</sub>                                 | 280 °C, 60bar H <sub>2</sub> , 0.75h                     | 100       | 40             | 0.12                                                                                                   | [7]              |
| 11       | 16wt%Ni-2wt%<br>Cu/Al <sub>2</sub> O <sub>3</sub>         | 300°C, 10bar H <sub>2</sub> ,<br>continuous-flow study   | 78.6      | 95.9           | -                                                                                                      | [8]              |
| 12       | 20wt%Ni/TiO <sub>2</sub><br>20wt%Ni/SBA-15                | 310°C, 15bar H <sub>2</sub> ,<br>WHSV=20.4 <sup>-h</sup> | 100       | ~90%           | -                                                                                                      | [9]              |
| 13       | 10wt%Ni/SBA-15                                            | 280°C, 35bar H <sub>2</sub> , 6h                         | 100       | 100            | 2.98                                                                                                   | [10]             |
| 14       | 5wt%Ni/HSZ                                                | 200°C, 68bar H <sub>2</sub> , 2.3 h                      | 98        | 84             | 3.68                                                                                                   | [11]             |

<sup>a</sup>R<sub>HDO</sub> = mol of the deoxygenated product (cyclohexane)/mass of Ni present in the catalyst \* time(h)

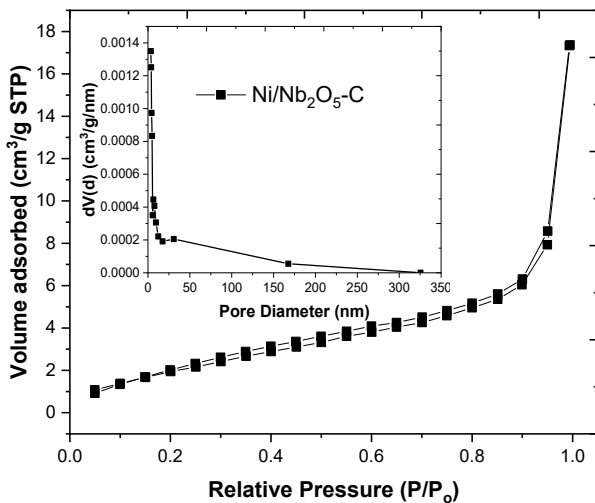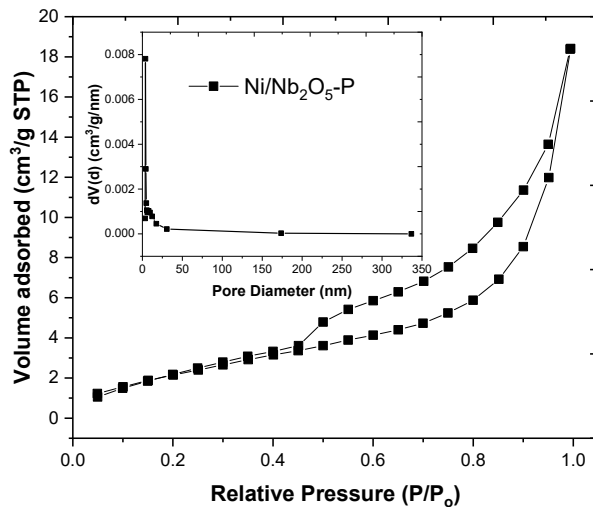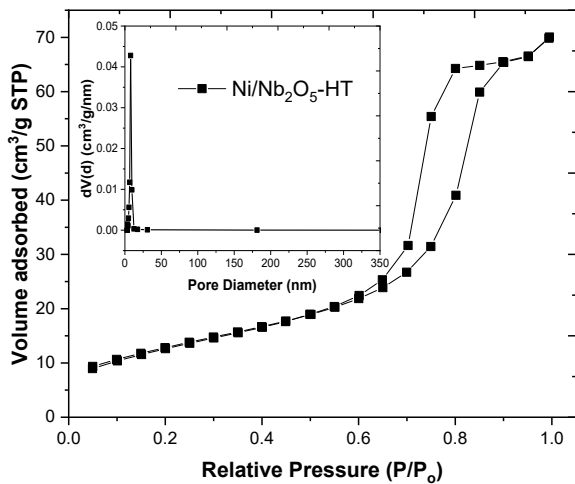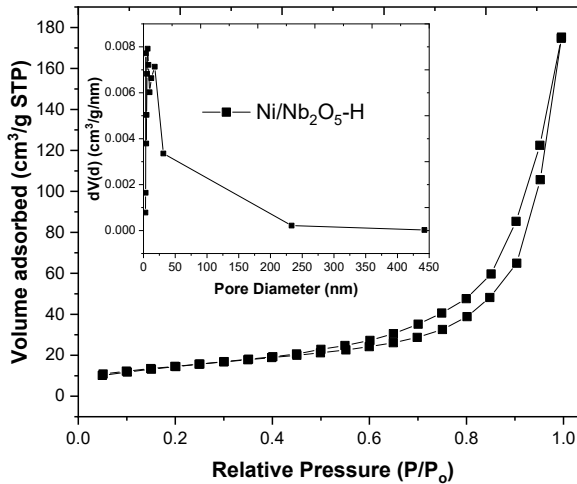

Figure S1. Physisorption isotherm of various Ni/Nb<sub>2</sub>O<sub>5</sub> catalysts

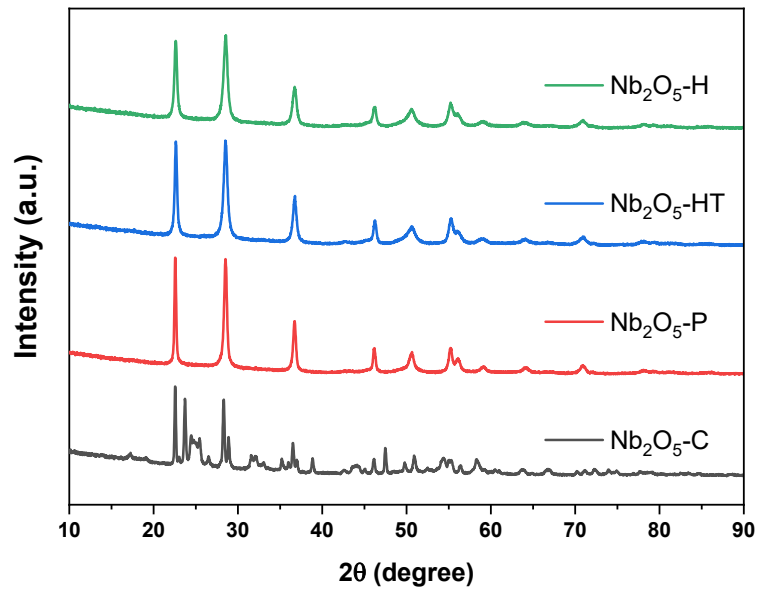

**Figure S2.** XRD patterns of Nb<sub>2</sub>O<sub>5</sub> support

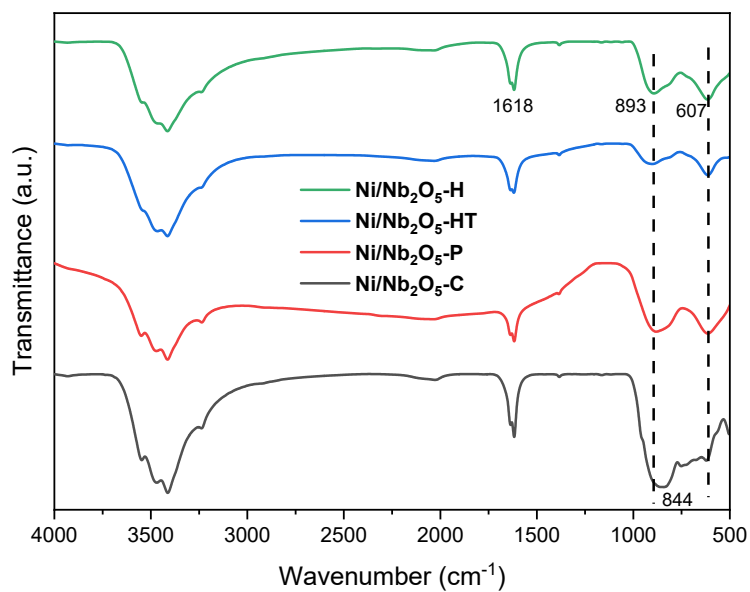

**Figure S3.** FTIR spectra of Ni/Nb<sub>2</sub>O<sub>5</sub> catalysts

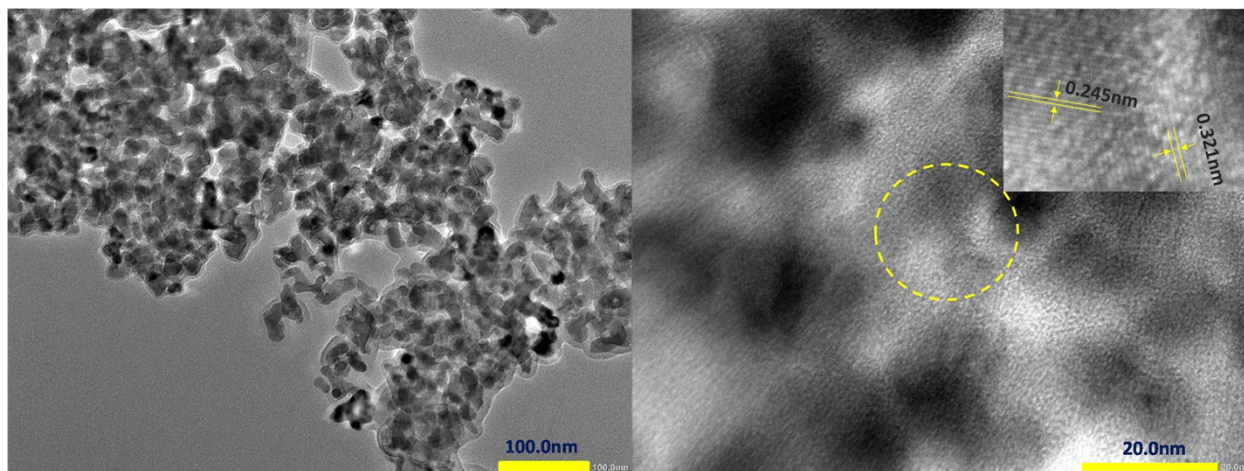

**Figure S4.** TEM (left) and HR-TEM (right) images of Ni/Nb<sub>2</sub>O<sub>5</sub>-H catalyst

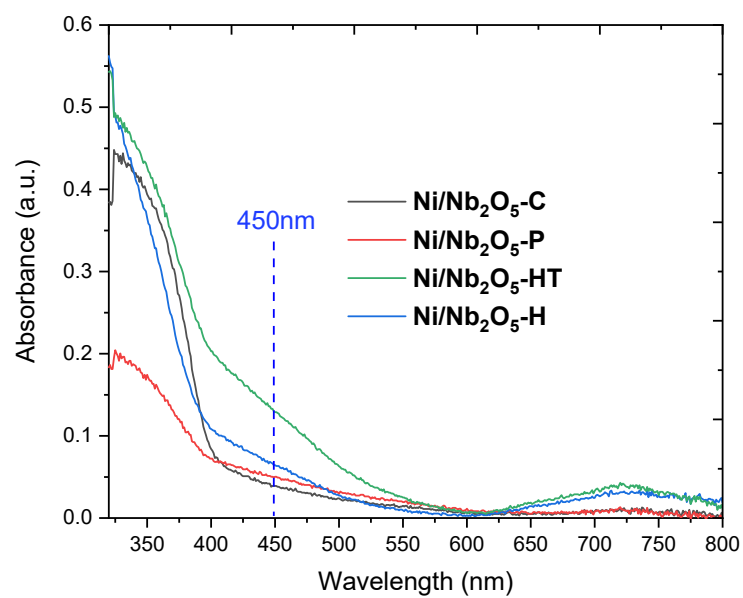

**Figure S5.** DRS-UV-Vis absorbance spectra of Ni/Nb<sub>2</sub>O<sub>5</sub> catalysts

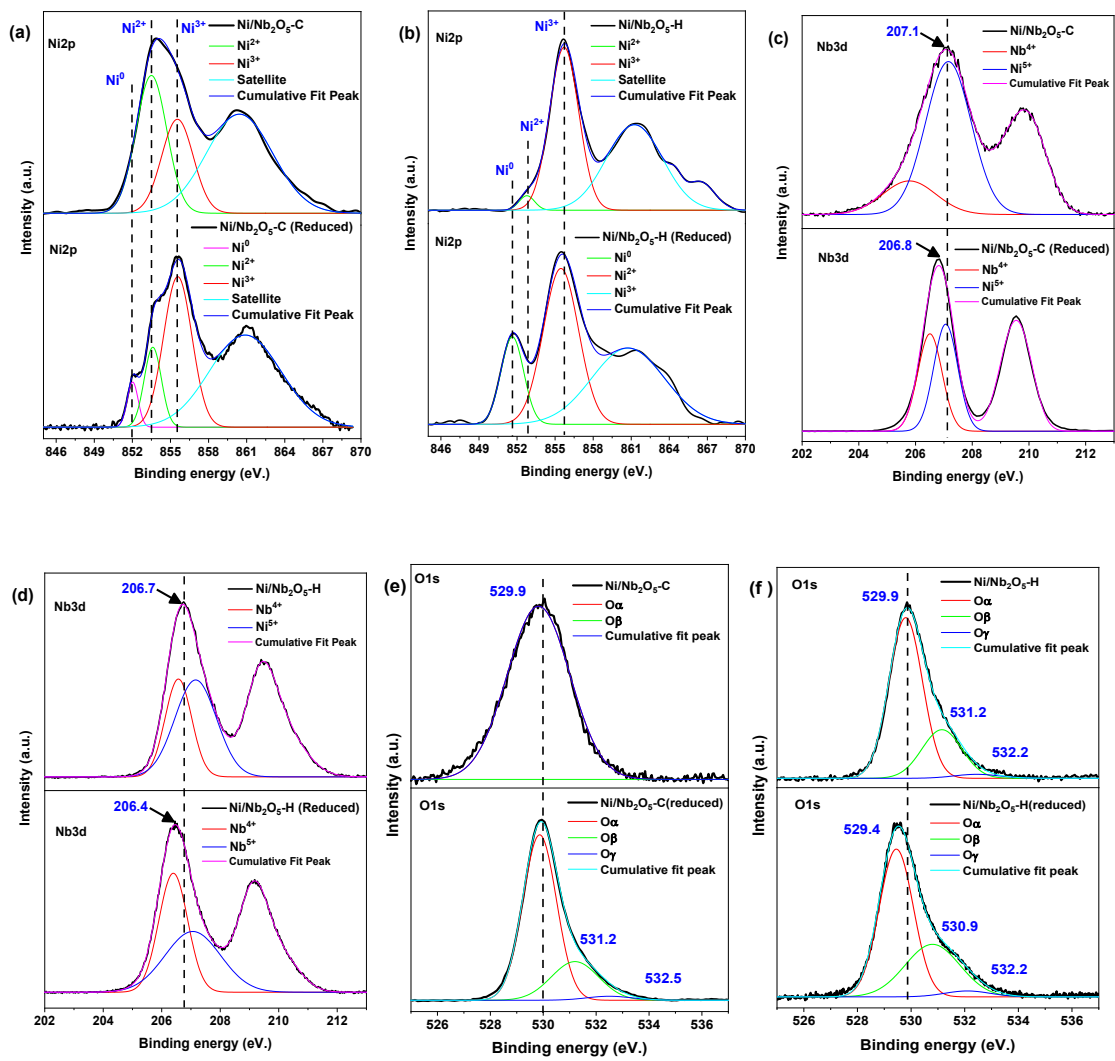

**Figure S6.** XPS spectra of (a) and (b) for Ni2p, (c) and (d) for Nb3d, (e) and (f) for O1s of Ni/Nb<sub>2</sub>O<sub>5</sub>-C and Ni/Nb<sub>2</sub>O<sub>5</sub>-H before and after reduction

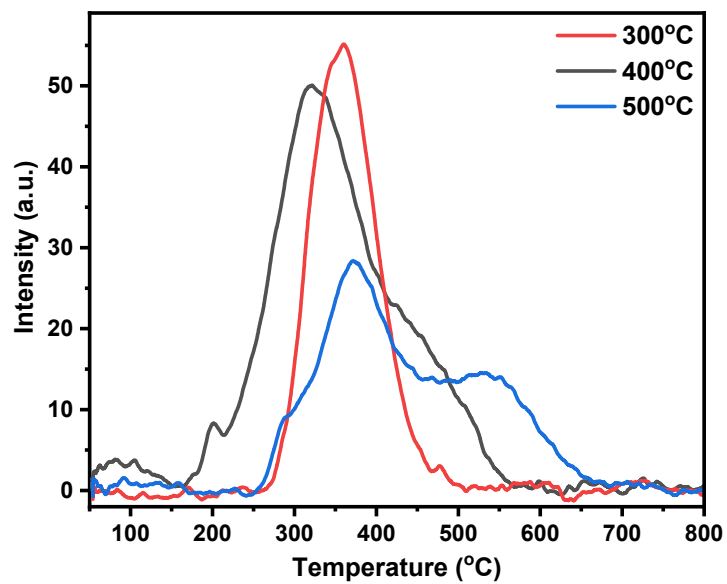

**Figure S7.** H<sub>2</sub>-TPD of Ni/Nb<sub>2</sub>O<sub>5</sub>-H catalysts at a different reduction temperature

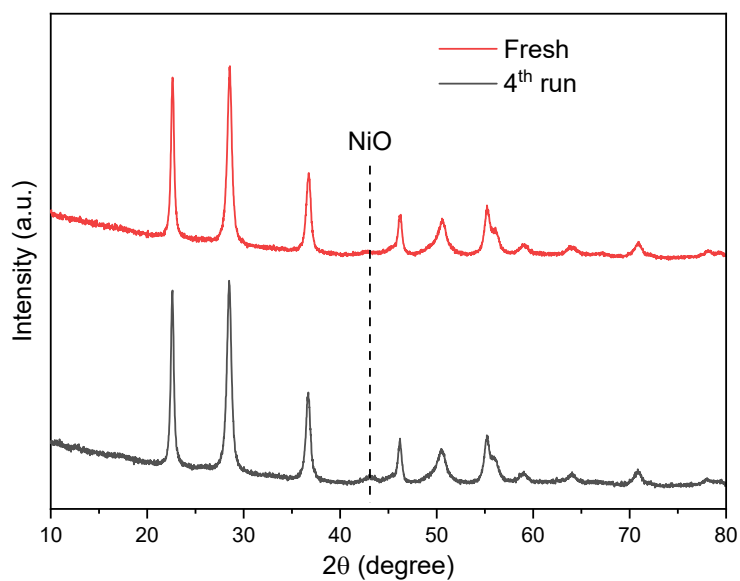

**Figure S8.** XRD pattern of fresh and spent Ni/Nb<sub>2</sub>O<sub>5</sub>-H



## References

1. X. Zhang, W. Tang, Q. Zhang, T. Wang and L. Ma, *Appl. Energy*, 2018, **227**, 73-79.
2. Y. Zhang, G. Fan, Y. Lin, L. Yang and F. Li, *Appl. Catal. A: Gen.*, 2022, **631**, 118481.
3. S. Jin, Z. Xiao, Li, C., X. Chen, L. Wang, J. Xing, W. Li and C. Liang, *Catal. Today*, 2014, **234**, 125-132.
4. J. Xu, P. Zhu, I. H. El Azab, B. B. Xu, Z. Guo, A. Y. Elnaggar, G. A. Mersal, X. Liu, Y. Zhi, Z. Lin and H. Algadi, *Chin. J. Chem. Eng.*, 2022, **49**, 187-197.
5. N. S. Nesterov, A. A. Smirnov, V. P. Pakharukova, V. A. Yakovlev, and O. N. Martyanov, *Catal. Today*, 2021, **379**, 262-271.
6. R. Rios-Escobedo, E. Ortiz-Santos, J. A. Colín-Luna, J. N. Díaz de León, P. del Angel, J. Escobar and J. A. de los Reyes, *Top. Catal*, 2022, 1-14.
7. S. A. Khromova, A. A. Smirnov, O. A. Bulavchenko, A. A. Saraev, V. V. Kaichev, S. I. Reshetnikov and V. A. Yakovlev, *Appl. Catal. A: Gen.*, 2014, **470**, 261-270.
8. A. R. Ardiyanti, S. A., Khromova, R. H. Venderbosch, V. A. Yakovlev, and H. J. Heeres, *Appl. Catal. B: Environ.*, 2012, **117**, 105-117.
9. Y. Yang, J. Hao, and G. Lv, *Fuel*, 2019, **253**, 630-636.
10. H. Vargas-Villagran, M. A. Flores-Villeda, I. Puente-Lee, D. A. Solis-Casados, A. Gomez-Cortes, G. Diaz-Guerrero and T. E. Klimova, *Catal. Today*, 2020, **349**, 26-41.
11. W. Li, F. Li, H. Wang, M. Liao, P. Li, J. Zheng, C. Tu, and R. Li, *Mol. Catal.*, 2020, **480**, 110642.
